# Supplementary material
Source: PubMed Central journal article supplement (PMC7740760)
Supplement: NIHMS1644231-supplement-Supplementary_Fig__1_rev_PDF.pdf [file NIHMS1644231-supplement-Supplementary_Fig__1_rev_PDF.pdf]

Kauffman et al.  
Supplementary Figure 1

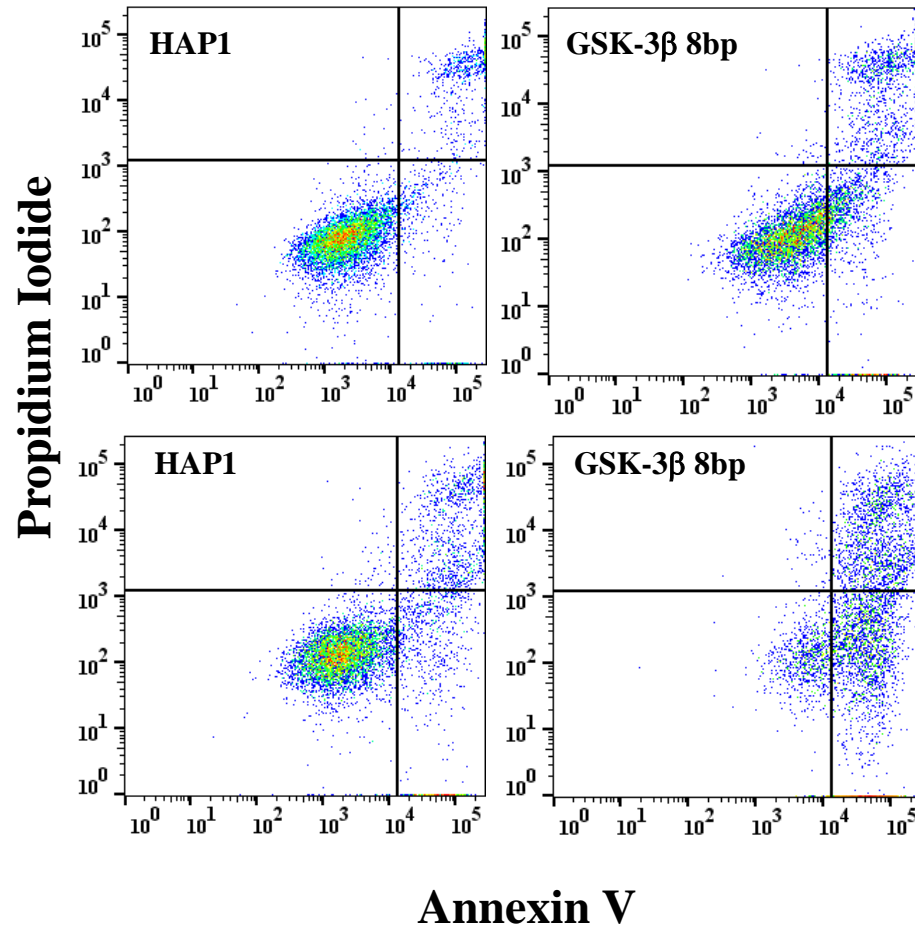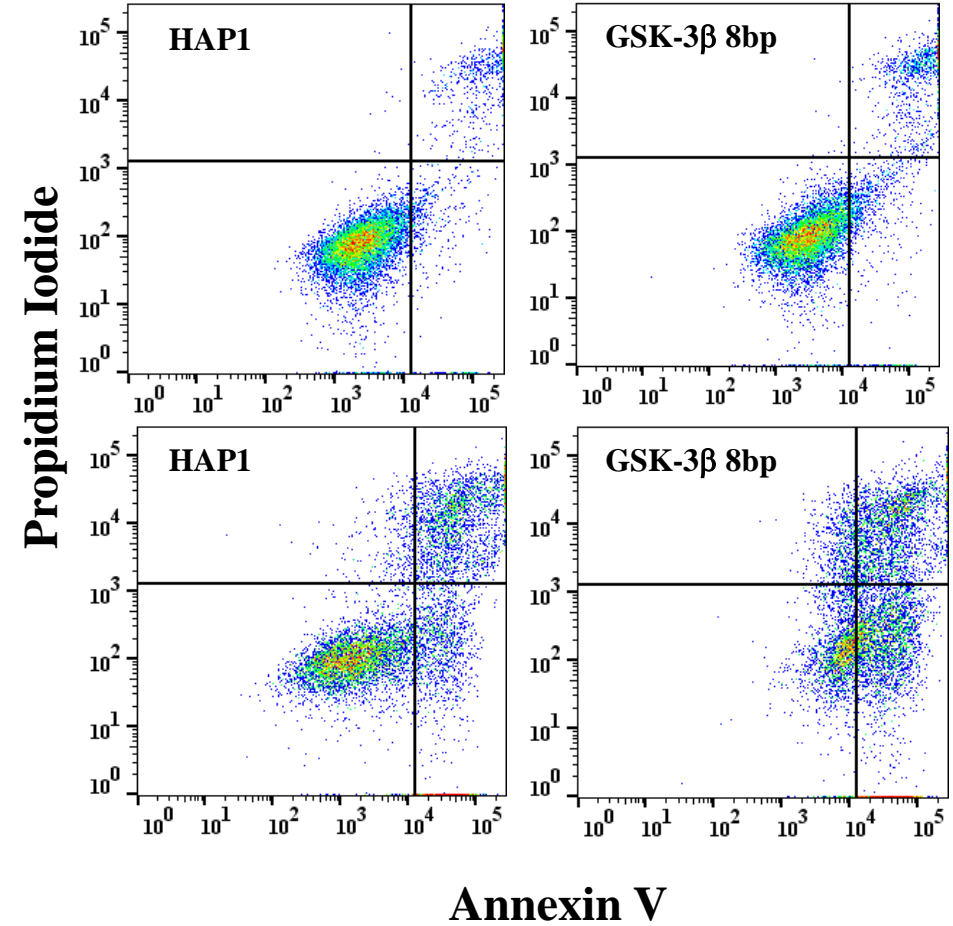

**Supplementary Figure 1.** Additional replicate experiments supporting data presented in Figures 6 and 7. Effect of IFN- $\gamma$  on apoptosis measured via flow cytometry. HAP1 and GSK-3 $\beta$  8bp cells were treated with media (upper panels) or media supplemented with 1000 U/mL of IFN- $\gamma$  (lower panels) for 48 hours. Subsequently the cells were stained with annexin V and PI and analyzed via two-parameter flow cytometric analysis. Two sets of dot-plots representative of three separate experiments are shown (other replicate is Figure 6 of main text). Signals due to annexin V and PI are on the x- and y-axes, respectively. Right quadrants are considered shifted for annexin V staining and upper right quadrant is considered shifted for PI staining. Upper right quadrant represents late-apoptotic/necrotic cells and lower right quadrant represents early apoptotic cells [32].
